# Supplementary material
Source: PubMed Central journal article supplement (PMC240667)

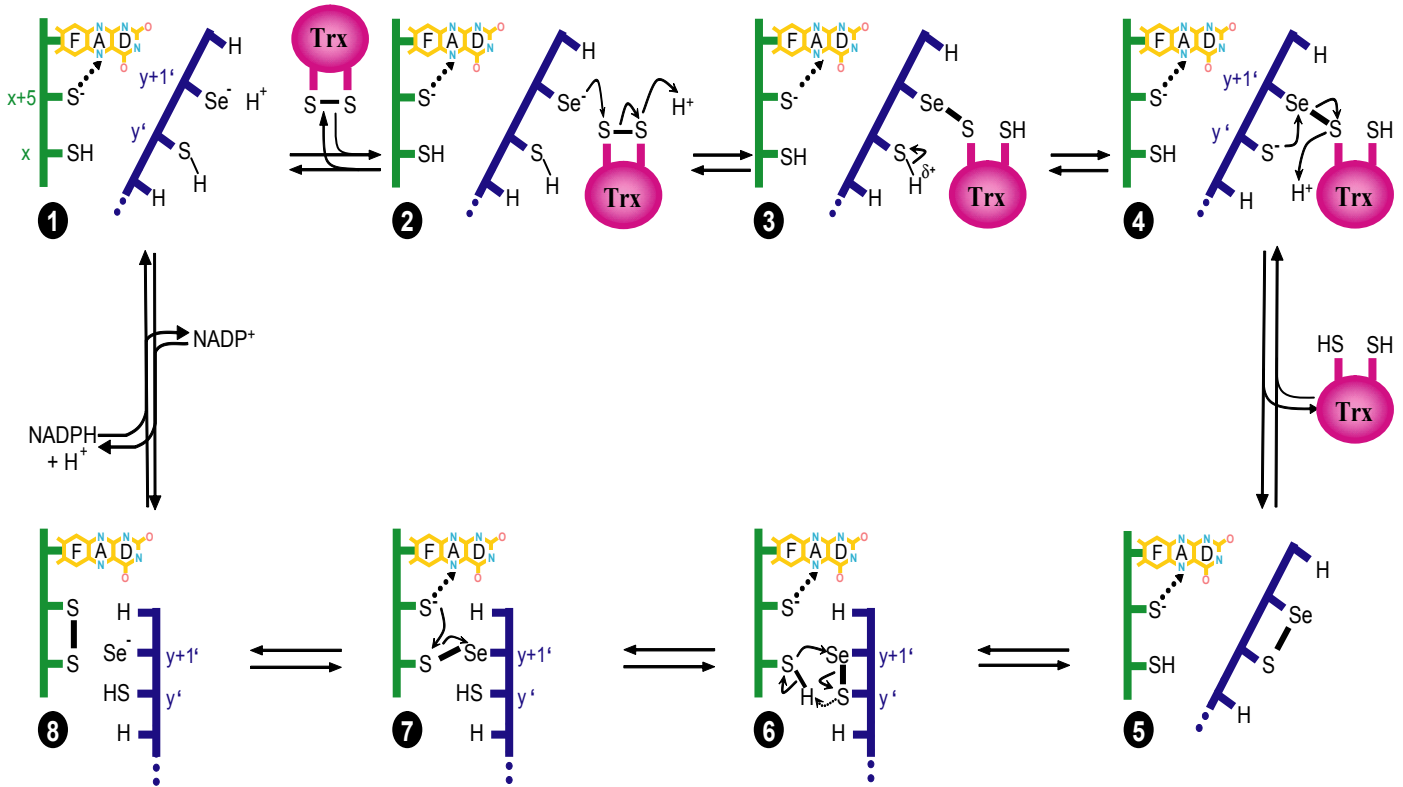

Supplement: pnas_100_22_12618__10.pdf [file pnas_100_22_12618__10.pdf]

protein  
staining

$^{75}\text{Se}$ -auto-  
radiogram

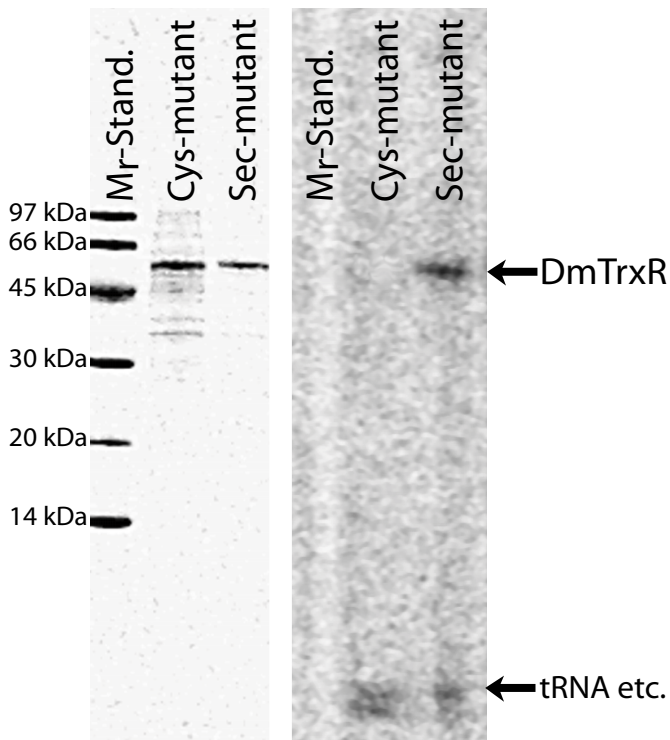

Supplement: pnas_100_22_12618__4.pdf [file pnas_100_22_12618__4.pdf]

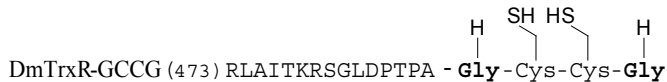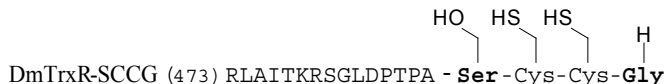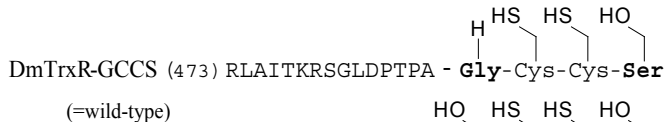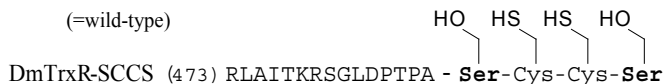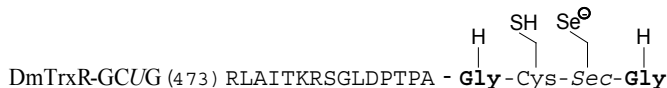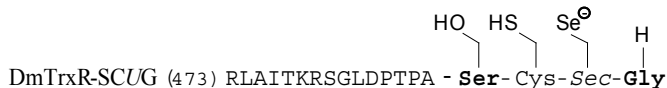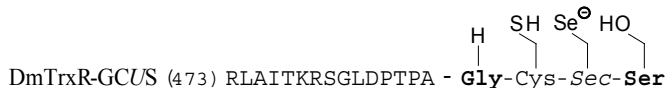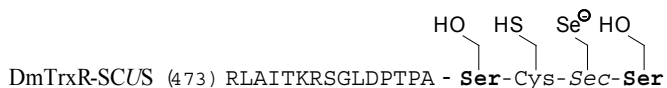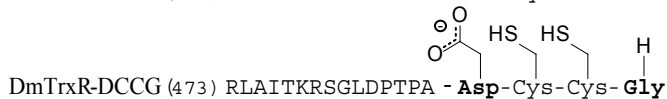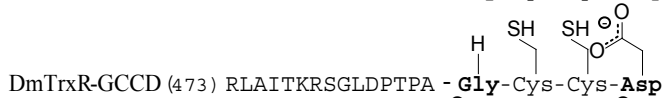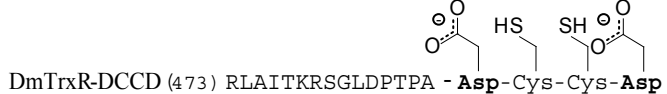

Supplement: pnas_100_22_12618__6.pdf [file pnas_100_22_12618__6.pdf]

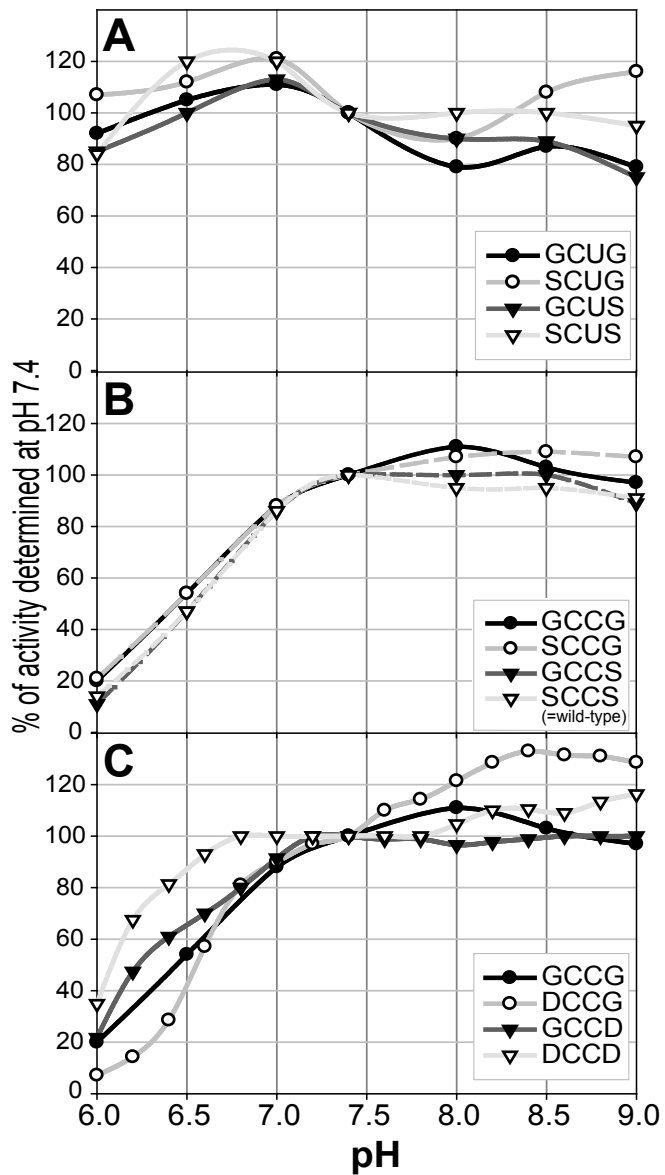

Supplement: pnas_100_22_12618__8.pdf [file pnas_100_22_12618__8.pdf]
